# Supplementary material for: Risk Preferences Around the World
Source: Atypon-hosted journal article supplement (doi:10.1287/mnsc.2013.1869), 2014-02-21
Supplement: mnsc.2013.1869-sm-english-questionnaire-intra.pdf [file mnsc.2013.1869-sm-english-questionnaire-intra.pdf]

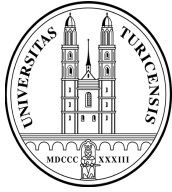

University of Zürich

# Questionnaire

In this questionnaire we ask you to answer two types of questions:

In the first part, you are asked to make some hypothetical decisions.

In the second part, we ask you some questions regarding your personal attitudes towards life in general.

***Remember there are no right or wrong answers. We are interested in your own preference and attitudes.***

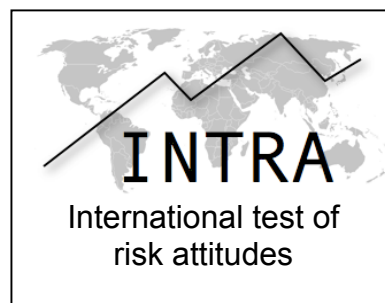

## Part I. Decisions

Please imagine the following offers and mark your choice:

**Question 1.** Which offer would you prefer:

- A. a payment of 3400\$ this month
- B. a payment of 3800\$ next month

I prefer  A  B

---

Please fill in the amount for which you consider the alternatives A and B as equally attractive:

**Question 2.** Please consider the following alternatives:

- A. a payment of 100 \$ now
  - B. a payment of  $X$  \$ in one year from now
- $X$  has to be at least \_\_\_\_\_ \$, such that B is as attractive as A.

**Question 3.** Please consider the following alternatives:

- A. a payment of 100 \$ now
  - B. a payment of  $X$  \$ in 10 years from now
- $X$  has to be at least \_\_\_\_\_ \$, such that B is as attractive as A.
- 

Please imagine the following offers and mark your choice:

**Question 4.** In an urn, there are 100 balls with three colors (red, yellow, and blue). 30 balls are red, whereas the remaining 70 consist of yellow and blue balls.

|          |          |      |
|----------|----------|------|
| 30 balls | 70 balls |      |
| red      | yellow   | blue |

Imagine a ball is randomly drawn from the urn. You are offered the following two Lotteries. Which lottery would you prefer?

- A. If the color of this ball is red, you win 100 \$; otherwise you win nothing.
- B. If the color of this ball is yellow, you win 100 \$; otherwise you win nothing.

I prefer  A  B

Imagine you are offered the Lotteries below. Please indicate the maximum amount you are willing to pay for the lottery.

**Lottery 1.**

|            |               |
|------------|---------------|
| 10% chance | Win of 10 \$  |
| 90% chance | Win of 100 \$ |

I am willing to pay at most \_\_\_\_ \$ to play the lottery.

**Lottery 2.**

|            |            |
|------------|------------|
| 40% Chance | Win 0 \$   |
| 60% Chance | Win 100 \$ |

I am willing to pay at most \_\_\_\_ \$ to play the lottery.

**Lottery 3.**

|            |            |
|------------|------------|
| 10% Chance | Win 0 \$   |
| 90% Chance | Win 100 \$ |

I am willing to pay at most \_\_\_\_ \$ to play the lottery.

**Lottery 4.**

|            |                 |
|------------|-----------------|
| 40% Chance | Win of 0 \$     |
| 60% Chance | Win of 10000 \$ |

I am willing to pay at most \_\_\_\_ \$ to play the lottery.

**Lottery 5.**

|            |               |
|------------|---------------|
| 90% Chance | Win of 0 \$   |
| 10% Chance | Win of 100 \$ |

I am willing to pay at most \_\_\_\_ \$ to play the lottery.

**Lottery 6.**

|            |               |
|------------|---------------|
| 40% Chance | Win of 0 \$   |
| 60% Chance | Win of 400 \$ |

I am willing to pay at most \_\_\_\_ \$ to play the lottery.

The following Lotteries involve losses. Imagine you have to play these Lotteries, unless you pay a certain amount of money beforehand. What is the maximum amount you would be willing to pay, in order to avoid playing the lottery? This corresponds to buying an insurance that saves you from suffering potential losses.

**Lottery 7.**

|            |                 |
|------------|-----------------|
| 60% chance | Loss of 80 \$   |
| 40% chance | No loss, no win |

I am willing to pay at most \_\_\_\_ \$ to avoid the lottery.

**Lottery 8.**

|            |                 |
|------------|-----------------|
| 60% Chance | Loss of 100 \$  |
| 40% Chance | no loss, no win |

I am willing to pay at most \_\_\_\_ \$ to avoid the lottery.

In the following Lotteries you have a 50% chance to win or lose money. The potential loss is given. Please state the minimum amount  $X$  for which you would be willing to accept the lottery.

**Lottery 9.**

|            |               |
|------------|---------------|
| 50% chance | Loss of 25 \$ |
| 50% chance | Win of $X$ \$ |

$X$  should be at least \_\_\_\_ \$ to make the lottery acceptable.

**Lottery 10.**

|            |                |
|------------|----------------|
| 50% Chance | Loss of 100 \$ |
| 50% Chance | Win of $X$ \$  |

$X$  should be at least \_\_\_\_ \$ to make the lottery acceptable.

## Part II. Attitudes

**A. Please think of an ideal job, disregarding your present job, if you have one. In choosing an ideal job, how important would it be to you to ... (Please mark one answer in each row with a circle):**

1 = of utmost importance  
 2 = very important  
 3 = of moderate importance  
 4 = of little importance  
 5 = of very little or no importance

|                                                                                                     | Of utmost<br>Importance | very<br>important | of moderate<br>importance | of little<br>importance | of very little or<br>no importance |
|-----------------------------------------------------------------------------------------------------|-------------------------|-------------------|---------------------------|-------------------------|------------------------------------|
| 1. have sufficient time for your personal or family life                                            | 1                       | 2                 | 3                         | 4                       | 5                                  |
| 2. have good physical working conditions (good ventilation and lighting, adequate work space, etc.) | 1                       | 2                 | 3                         | 4                       | 5                                  |
| 3. have a good working relationship with your direct superior                                       | 1                       | 2                 | 3                         | 4                       | 5                                  |
| 4. have security of employment                                                                      | 1                       | 2                 | 3                         | 4                       | 5                                  |
| 5. work with people who cooperate well with one another                                             | 1                       | 2                 | 3                         | 4                       | 5                                  |
| 6. be consulted by your direct superior in his/her decisions                                        | 1                       | 2                 | 3                         | 4                       | 5                                  |
| 7. have an opportunity for advancement to higher level jobs                                         | 1                       | 2                 | 3                         | 4                       | 5                                  |
| 8. have an element of variety and adventure in the job                                              | 1                       | 2                 | 3                         | 4                       | 5                                  |

**B. In your private life, how important is each of the following for you? (Please mark one answer in each row with a circle):**

|                           | Of utmost<br>Importance | very<br>important | of moderate<br>importance | of little<br>importance | of very little or<br>no importance |
|---------------------------|-------------------------|-------------------|---------------------------|-------------------------|------------------------------------|
| 9. Thrift                 | 1                       | 2                 | 3                         | 4                       | 5                                  |
| 10. Respect for tradition | 1                       | 2                 | 3                         | 4                       | 5                                  |

**C. Experience during your work (Please mark one answer in each row with a circle):**

|                                                     | never | seldom | sometimes | usually | always |
|-----------------------------------------------------|-------|--------|-----------|---------|--------|
| 11. How often do you feel nervous or tense at work? | 1     | 2      | 3         | 4       | 5      |

|                                                                                                                |                  |             |                |                 |                      |
|----------------------------------------------------------------------------------------------------------------|------------------|-------------|----------------|-----------------|----------------------|
| 12a. How frequently are you afraid to express disagreement with superiors?                                     | very seldom<br>1 | seldom<br>2 | sometimes<br>3 | frequently<br>4 | very frequently<br>5 |
| 12b. How frequently, in your experience, are subordinates afraid to express disagreement with their superiors? | very seldom<br>1 | seldom<br>2 | sometimes<br>3 | frequently<br>4 | very frequently<br>5 |

**D. To what extent do you agree or disagree with each of the following statements? (Please mark one answer in each row with a circle):**

1 = strongly agree  
 2 = agree  
 3 = undecided  
 4 = disagree  
 5 = strongly disagree

|                                                                                                                                       |                     |            |                |               |                        |
|---------------------------------------------------------------------------------------------------------------------------------------|---------------------|------------|----------------|---------------|------------------------|
| 13. Most people can be trusted                                                                                                        | strongly agree<br>1 | agree<br>2 | undecided<br>3 | disagree<br>4 | strongly disagree<br>5 |
| 14. One can be a good manager without having precise answers to most questions that subordinates may raise about their work           | 1                   | 2          | 3              | 4             | 5                      |
| 15. An organization structure in which certain subordinates have two bosses should be avoided at all costs                            | 1                   | 2          | 3              | 4             | 5                      |
| 16. Competition between employees usually does more harm than good                                                                    | 1                   | 2          | 3              | 4             | 5                      |
| 17. A company's or organization's rules should not be broken - not even when the employee thinks it is in the company's best interest | 1                   | 2          | 3              | 4             | 5                      |
| 18. When people have failed in life it is often their own fault                                                                       | 1                   | 2          | 3              | 4             | 5                      |

**E. View on your life**

|                                                           |                   |                            |              |                        |                     |
|-----------------------------------------------------------|-------------------|----------------------------|--------------|------------------------|---------------------|
| 19. How satisfied are you overall with your present life? | dissatisfied<br>1 | slightly dissatisfied<br>2 | neutral<br>3 | somehow satisfied<br>4 | very satisfied<br>5 |
|-----------------------------------------------------------|-------------------|----------------------------|--------------|------------------------|---------------------|

**Finally, please fill in some personal information about yourself:**

Age: \_\_\_\_\_ Gender: \_\_\_\_\_ male \_\_\_\_\_ female

Major: \_\_\_\_\_

Citizenship: \_\_\_\_\_

I consider myself to belong to the following culture:

( ) *(Country in which test is performed)* ( ) Others: \_\_\_\_\_

*Thank you very much for your participation in INTRA,  
the international test of risk attitudes!*
